# Supplementary material for: The tale of springs and streams: how different aquatic ecosystems impacted the mtDNA population structure of two riffle beetles in the Western Carpathians
Source: PeerJ journal article supplement (doi:10.7717/peerj.10039), 2020-10-06

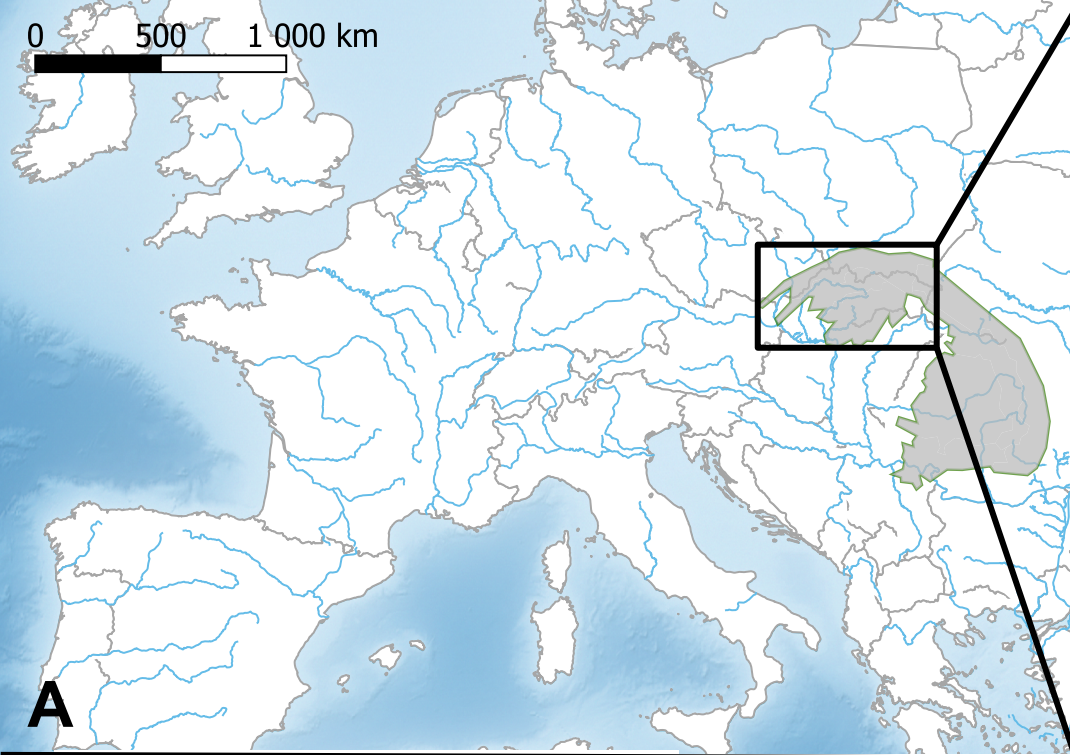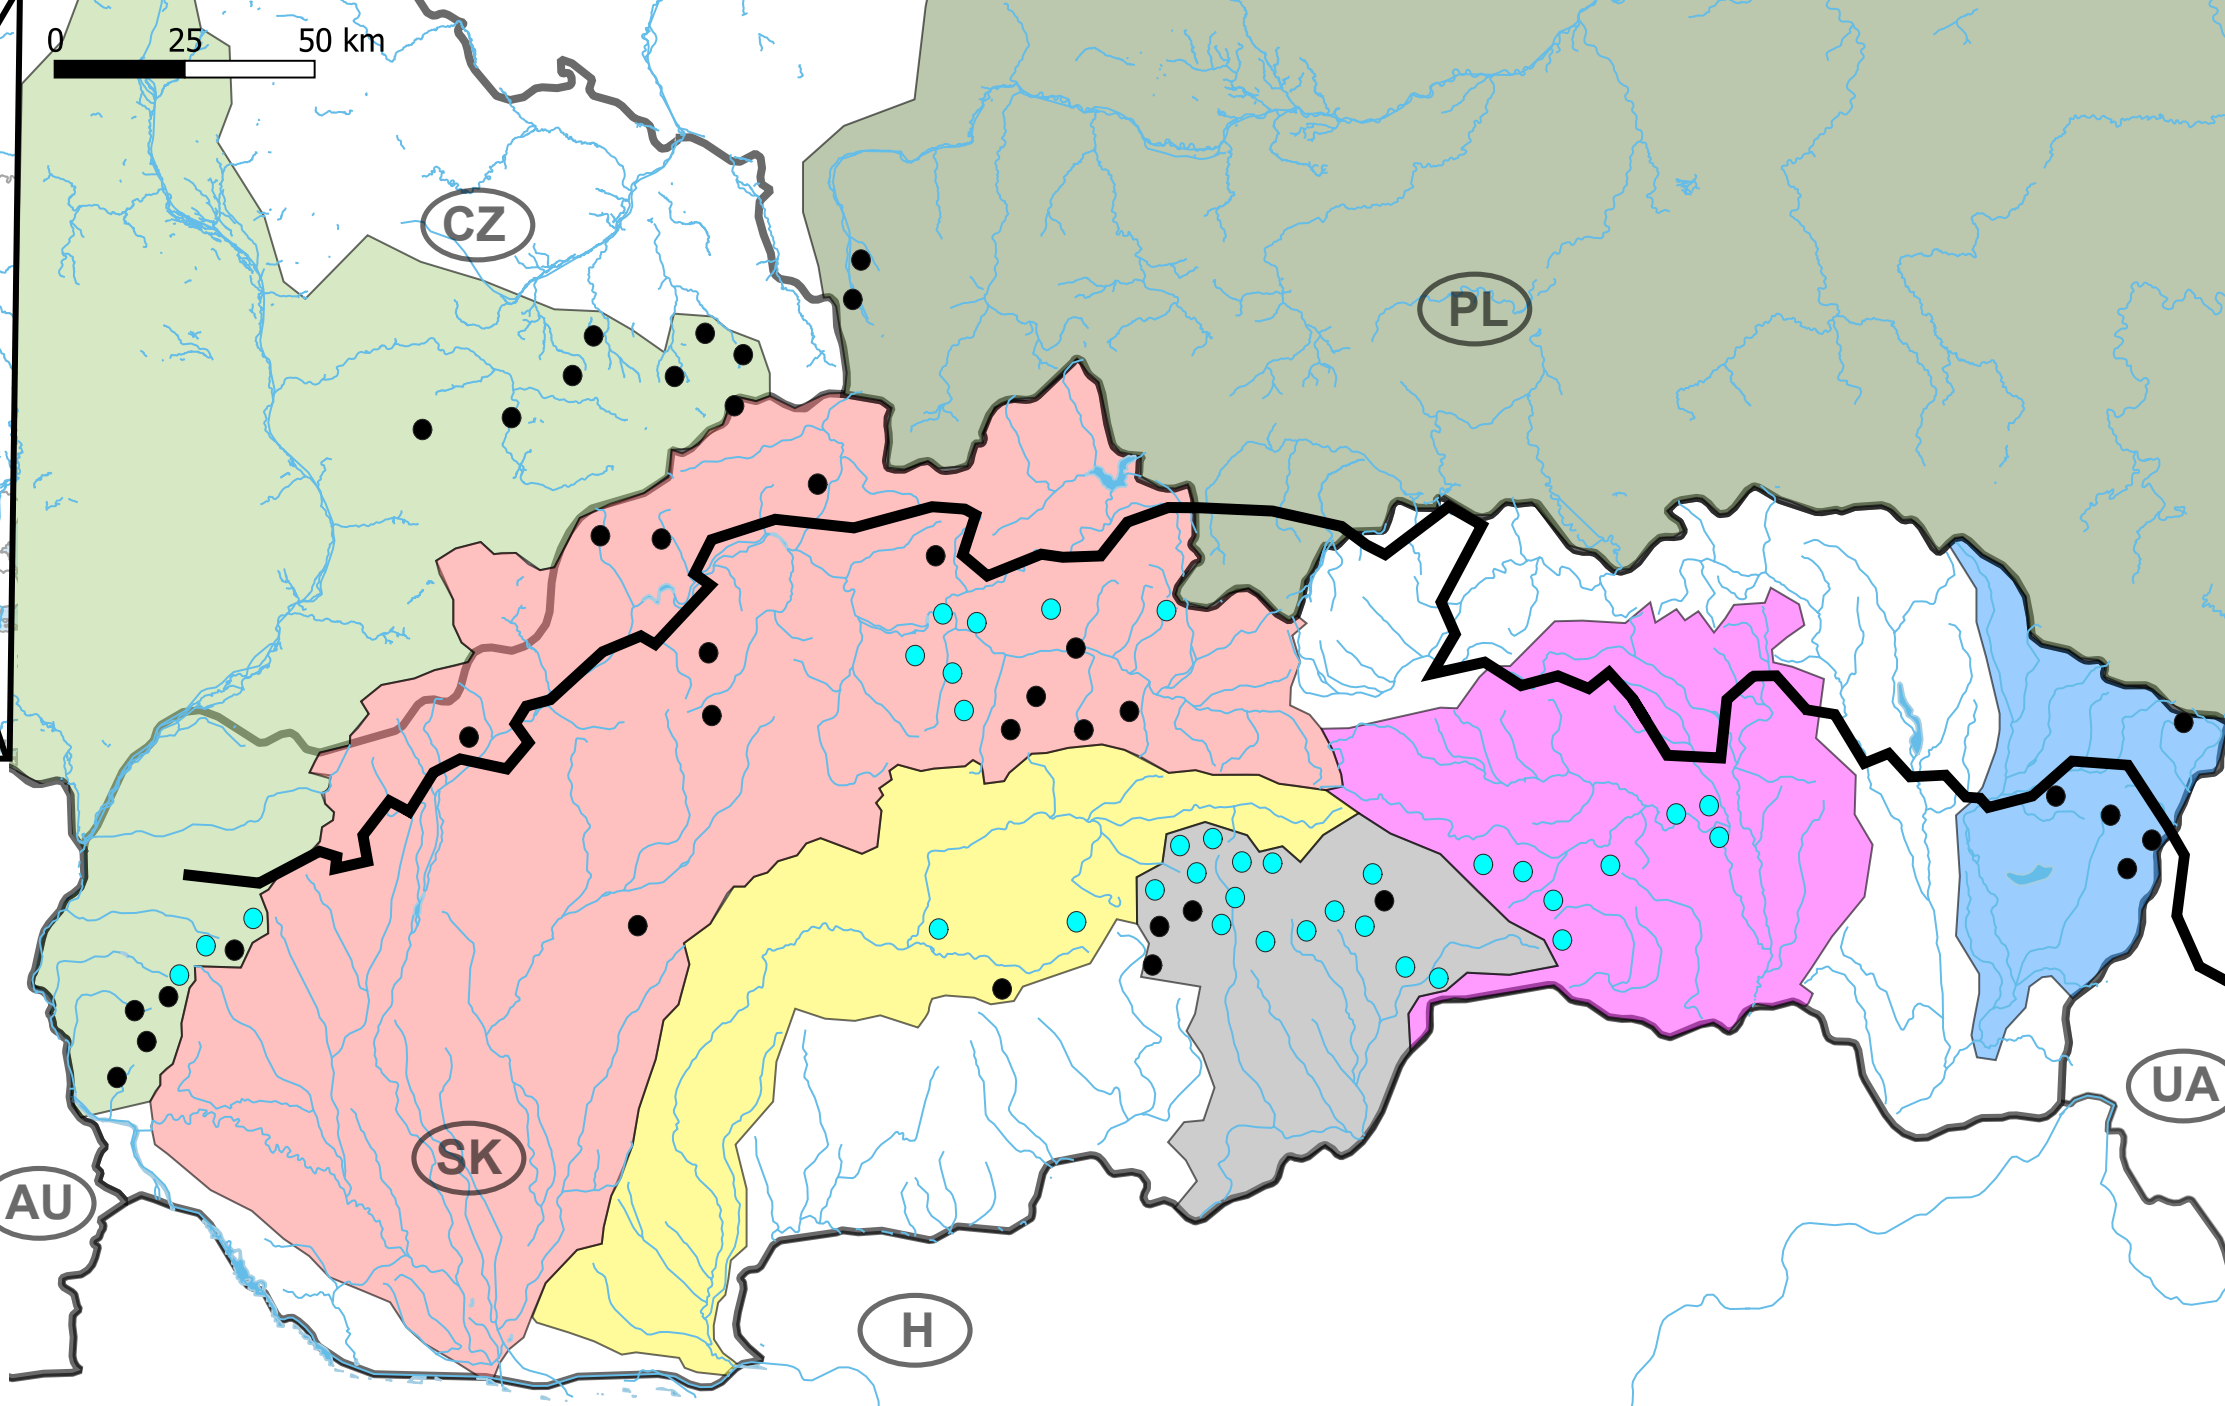

Supplement: Fig._S1.pdf [file Fig._S1.pdf]
